# Supplementary material
Source: PubMed Central journal article supplement (PMC2795553)
Supplement: 0911713106_0911713106SI.pdf [file 0911713106_0911713106SI.pdf]

# Supporting Information

Nam et al. 10.1073/pnas.0911713106

## SI Text

**Estimation of Oscillation Frequency.** The inverter propagation delay can be estimated based on

$$t = \frac{C_L V_{DD}}{2I_d}, \quad [1]$$

(ref. 1), where  $C_L$  is load capacitance,  $V_{DD}$  is supply voltage, and  $I_d$  is drain current.

$$\frac{V_{DD}}{I_d} \approx \frac{8V}{800 \mu A} = 10k\Omega, \quad [2]$$

where the value of  $I_d$  corresponds to either n- or p-type NW FET in the CMOS inverter when  $V_{DD}$  is 8 V. We assume that the top-gate capacitance ( $C_G$ ) and parasitic capacitance of the measurement probe ( $C_{probe}$ ) are the two major sources of load capacitance ( $C_L$ ). A range of  $C_G$  values was estimated based on the cylindrical capacitor model (2).

$$\frac{C_G}{L} = \frac{2\pi\epsilon\epsilon_0}{\ln\left[\frac{b}{a}\right]}, \quad [3]$$

where  $a$  is the radius of NW,  $b$  is the radius of NW plus high- $\kappa$  dielectric,  $\epsilon$  is the dielectric constant ( $\epsilon = 20$  for  $\text{HfO}_2$ ), and  $L$  is the gate channel length ( $L = 1.5 \mu\text{m}$ ). The upper limits of the capacitance values for the Ge/Si and InAs NWs, 0.87 and 1.52 fF,

correspond to a full cylindrical gate, and the lower bounds would be the capacitance of the half-cylinders, 0.44 and 0.76 fF, respectively. Assuming 40 Ge/Si NWs and 20 InAs NWs are in each channel, estimated top-gate capacitance range is between  $\approx 33$  fF and  $\approx 66$  fF. The value of  $C_{probe}$  was 100 fF (model 34A; Picoprobe).

Substituting the values from Eq. 3 into Eq. 1 with  $C_G = C_L$  yields inverter propagation delays,  $t_d$ , between 0.17 and 0.33 ns, which correspond to delays in two inverter stages ( $t_1$  and  $t_2$ )

$$t_1 = t_2 = t_d = \frac{C_G V_{DD}}{2I_d}. \quad [4]$$

The delay in the remaining inverter stage ( $t_3$ ), whose output is connected to the measurement probe is

$$t_3 = t_d + t_{probe} = \frac{V_{DD}}{2I_d}(C_G + C_{probe}), \quad [5]$$

where  $C_G$  is in parallel connection with the probe capacitance ( $C_{probe}$ ). The  $t_3$  ranges between 0.67 and 0.83 ns.

Finally, these delay times can be used to estimate the oscillation frequency ( $f$ ) of our three-stage ring oscillator by using (1)

$$f = \frac{1}{2 \cdot (2t_1 + t_3)}, \quad [6]$$

which gives oscillation frequency values from 336 to 495 MHz.

1. Taur Y, Ning TH (2005) *Fundamentals of Modern VLSI Devices* (Cambridge Univ Press, New York).

2. Wolfson R, Pasachoff JM (1994) *Physics for Scientists and Engineers* (HarperCollins College, New York).

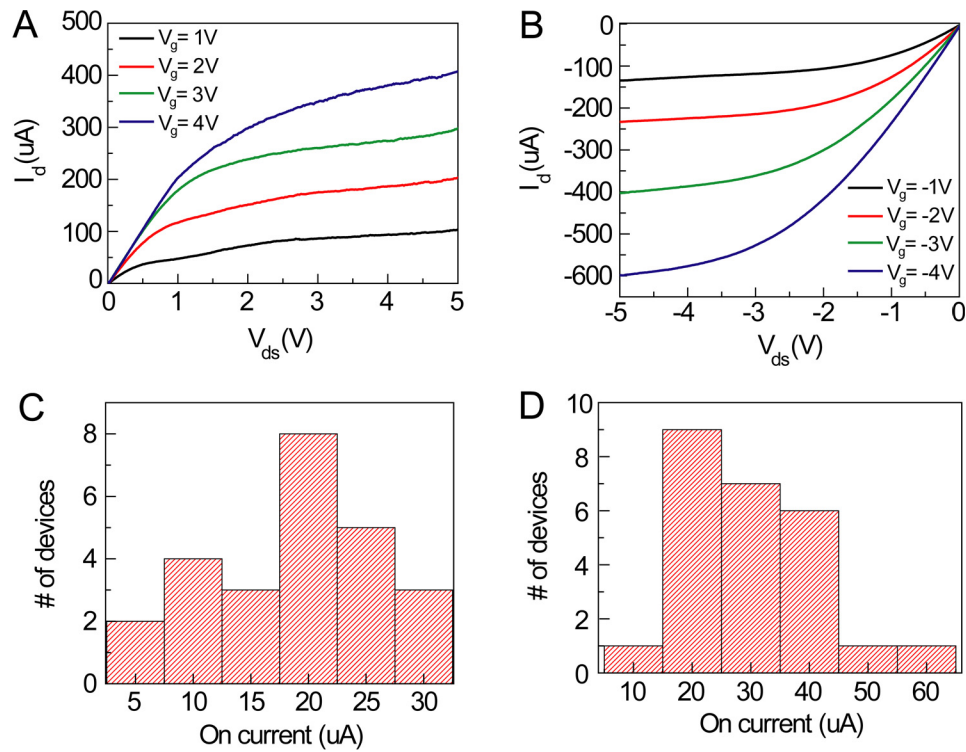

**Fig. S1.** n-InAs and p-Ge/Si NW FETs IV characteristics and statistical variations of on current levels. (A and B) Drain current ( $I_d$ ) vs. drain-source voltage ( $V_{ds}$ ) characteristics of an n-type InAs and a p-type Ge/Si NW FET, respectively. The data presented here are from similar but not identical devices, as shown in Fig. 2B. (C and D) Statistical variations of the on current levels of n-InAs (C) and p-Ge/Si NW FETs (D), when  $|V_{gs}| = 1$  V and  $|V_{ds}| = 1$  V. Average on current  $\pm 1$  SD of n-InAs and p-Ge/Si NW FETs are  $18.8 \pm 7.2 \mu\text{A}$  and  $30 \pm 11.3 \mu\text{A}$ , respectively.

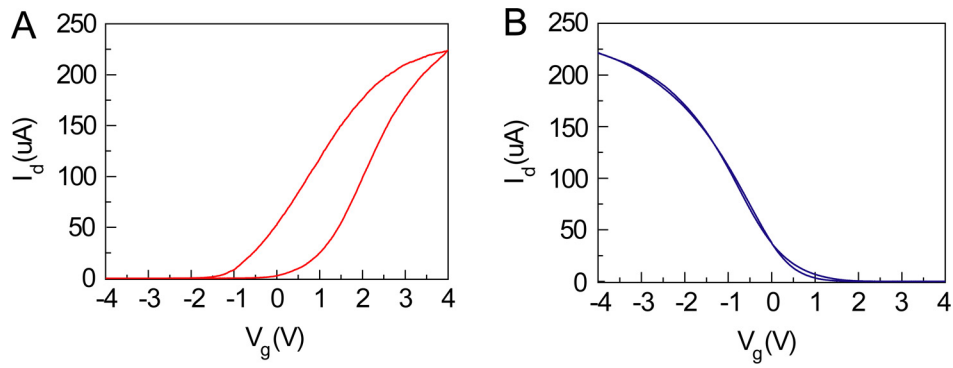

**Fig. S2.** DC transfer characteristics of n-InAs and p-Ge/Si NW FETs with bidirectional gate sweeps. (A) Drain current vs. gate voltage characteristics of n-InAs NW FET with forward and backward gate sweeps, when  $V_{ds} = 1$  V. (B) Transfer characteristics of p-Ge/Si NW FET with bidirectional gate sweeps, when  $V_{sd} = 1$  V. The data presented here are from similar but not identical devices, as shown in Fig. 2B and Fig. S1. The Ge/Si NW FET exhibits very little hysteresis and is typical of all of these NW FETs. In contrast, the InAs NW FETs typically exhibit hysteresis, as in A. The hysteresis, which is believed to arise from surface charge traps, will tend towards zero as operation frequency exceeds the charge-hopping frequency.

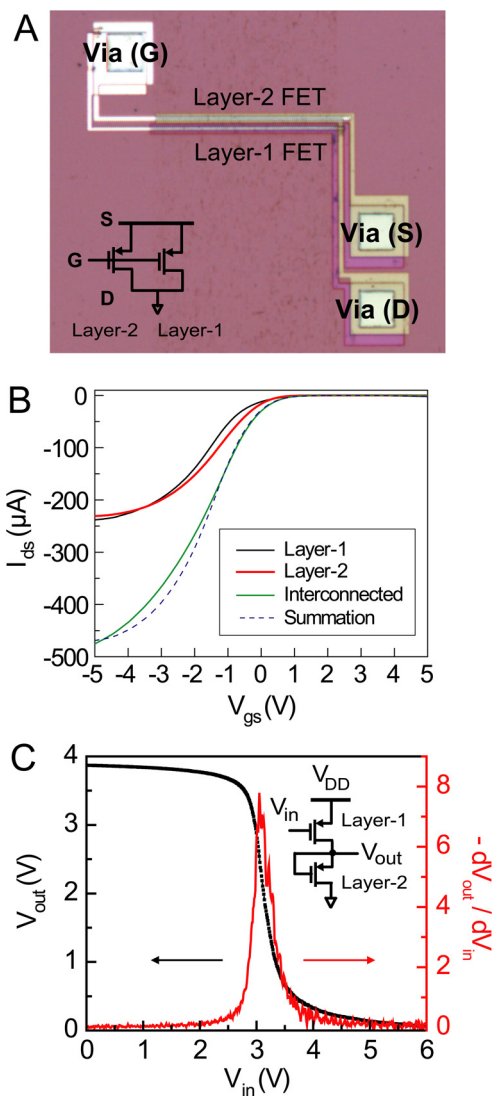

**Fig. S3.** Vertically interconnected pMOS FETs and inverter. (A) Optical microscope image of two-layer interconnected pMOS NW FET. Both layer-1 and layer-2 devices are fabricated by using Ge/Si p-type NWs. (Inset) Circuit schematic for the parallel connection of the p-FETs in the two layers. (B)  $I$ - $V_{gs}$  characteristics of the two-layer Ge/Si p-FETs before (black and red curves) and after interconnection (green curve) at  $V_{ds} = -1$  V. The dashed line corresponds to a summation of the black and red curves recorded from layer-1 and layer-2 NW FETs before interconnection. (C)  $V_{out}$  vs.  $V_{in}$  characteristics (black curve) and gain =  $dV_{out}/dV_{in}$  vs.  $V_{in}$  (red curve) characteristics of a pMOS inverter at supply voltage of 4 V. (Inset) Circuit diagram of two-layer pMOS inverter.

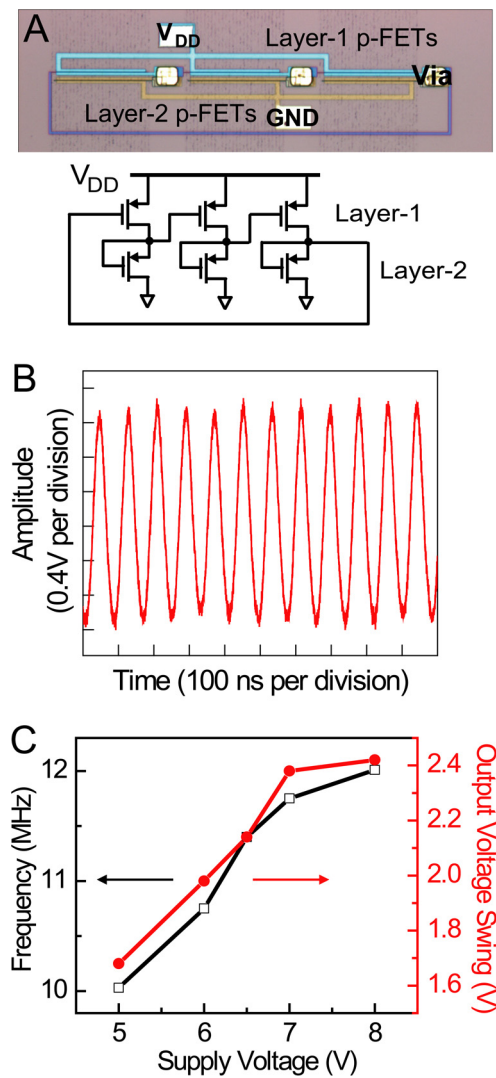

**Fig. S4.** Vertically integrated pMOS ring oscillator. (A) Optical microscope image of a two-layer, interconnected three-stage pMOS ring oscillator, where the layer-1 and layer-2 structures exhibit light-blue and brown contrast, respectively. The corresponding circuit schematic for the two-layer interconnected pMOS ring oscillator is shown. (B) Amplitude vs. time response recorded at via position by using a high-impedance probe. The supply voltage,  $V_{DD}$ , is 8 V, and the self-sustained oscillation frequency is 12 MHz. (C) Oscillation frequency (black curve) and output voltage swing (red curve) vs. supply voltage ( $V_{DD}$ ) for the two-layer, three-stage pMOS ring oscillator.

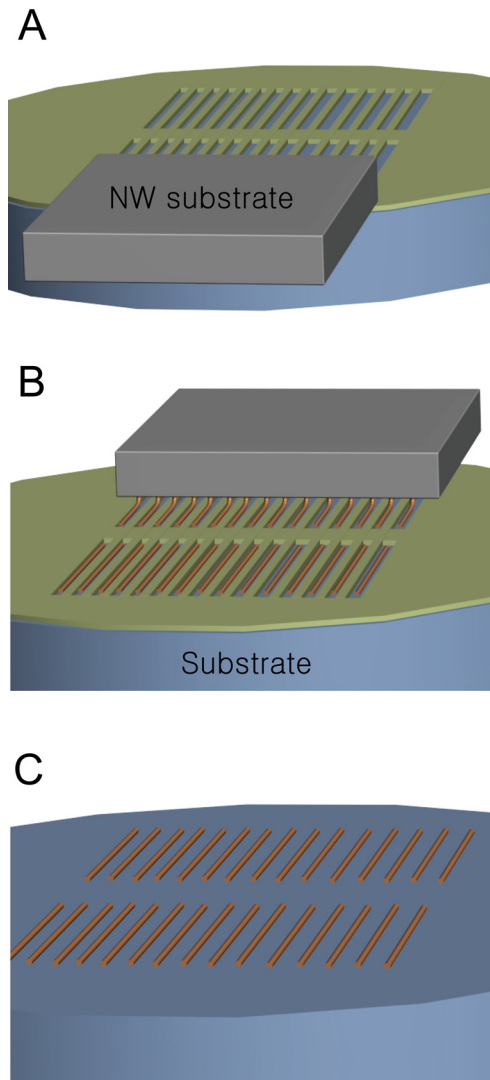

**Fig. S5.** Contact printing of NWs from growth substrate to patterned device substrate. (A) Schematic drawing showing NW growth substrate placed upside down on top of photoresist patterned device substrate. The NW density can be controlled by adjusting the photoresist trench width and spacing. (B) NWs are transferred from growth substrates to patterned device substrates by a shear printing process. Topside pressure of 0.5–1 kg/cm<sup>2</sup> and a travel distance of 1–3 mm are typical process parameters. (C) Aligned arrays of NWs with controlled density are realized after photoresist liftoff.

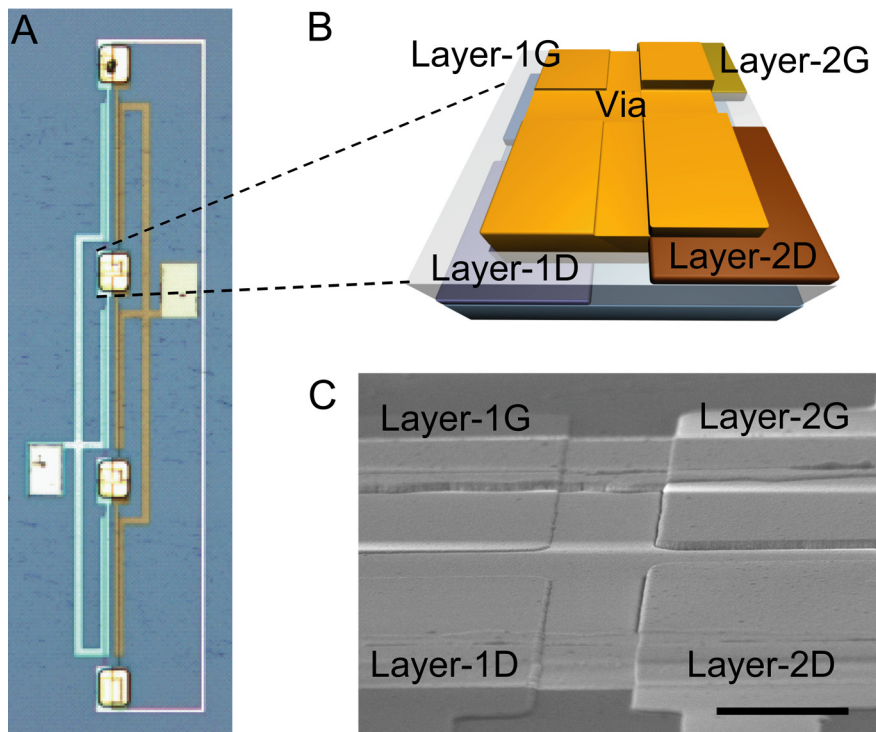

**Fig. S6.** Via interconnection strategy in CMOS ring-oscillator circuits. (A) Optical microscope image of CMOS ring-oscillator circuit. (B) Side tilted-view schematic drawing of via interconnection showing non-overlapping of metal electrodes at different layers. (C) Tilted-view SEM image of via interconnection. (Scale bar: 5  $\mu\text{m}$ .)
